# Supplementary material
Source: HighWire-hosted journal article supplement (http://rc.rcjournal.com/highwire/filestream/16300/field_highwire_adjunct_files/0/suppl.pdf)
Supplement: suppl.pdf [file suppl.pdf]

## Supplementary Material

Table S1: Prescribing criteria for domiciliary oxygen therapy<sup>9</sup>

| Type of oxygen therapy    | Prescribing criteria                                                                                                                                                                                                                                                                       |
|---------------------------|--------------------------------------------------------------------------------------------------------------------------------------------------------------------------------------------------------------------------------------------------------------------------------------------|
| Continuous oxygen therapy | <ul style="list-style-type: none"><li>• Resting PaO<sub>2</sub> ≤ 55mmHg; OR</li><li>• Resting PaO<sub>2</sub> 56 – 59 mmHg with evidence for hypoxic organ damage (including right heart failure, pulmonary hypertension or polycythaemia)</li></ul>                                      |
| Exertional oxygen therapy | <ul style="list-style-type: none"><li>• Exertional desaturation to SpO<sub>2</sub> 88% or less during a 6MWT while breathing room air; AND</li><li>• A demonstrable improvement in exercise performance or symptom on supplemental oxygen therapy during a blinded exercise test</li></ul> |

Abbreviations: 6MWT, 6-minute walk test; PaCO<sub>2</sub>, partial pressure of carbon dioxide in blood; PaO<sub>2</sub>, partial pressure of oxygen in blood; SpO<sub>2</sub>, oxyhaemoglobin saturation.

Table S2. Baseline patient demographic characteristics

| Characteristics                                  | Analysed Cohort<br>(n = 400) | Alfred Health<br>(n = 299) | Austin Health<br>(n = 101) | p-value |
|--------------------------------------------------|------------------------------|----------------------------|----------------------------|---------|
| Age (years)*                                     | 66 ± 12                      | 65 ± 11                    | 68 ± 12                    | 0.002   |
| Male (%)                                         | 61                           | 60                         | 64                         | 0.41    |
| Smoking history (%)                              |                              |                            |                            |         |
| Ever smoker                                      | 65                           | 65                         | 66                         | 0.90    |
| Never smoker                                     | 35                           | 35                         | 34                         |         |
| Cardiorespiratory comorbidities (%) <sup>‡</sup> | 47                           | 42                         | 63                         | 0.04    |
| BMI (kg/m <sup>2</sup> )*                        | 29.3 ± 5.8                   | 29.1 ± 6.2                 | 29.2 ± 5.9                 | 0.72    |
| Oxygen therapy (%)                               | 27                           | 26                         | 28                         | 0.79    |
| Long-term oxygen therapy                         | 12                           | 12                         | 12                         |         |
| Ambulatory oxygen therapy <sup>§</sup>           | 15                           | 14                         | 16                         |         |
| FEV1 (% predicted)*                              | 77.5 ± 18.8                  | 76.8 ± 18.5                | 79.6 ± 19.5                | 0.22    |
| FVC (% predicted)*                               | 73.5 ± 19.2                  | 72.4 ± 19.0                | 76.9 ± 19.3                | 0.06    |
| DLCO (% predicted)*                              | 53.2 ± 20.7                  | 54.0 ± 21.9                | 50.8 ± 16.8                | 0.49    |
| Exertional desaturation (%)                      | 54                           | 56                         | 45                         | 0.07    |
| 6-minute walk distance (m) †                     | 424 (330, 516)               | 444 (345, 528)             | 383 (302, 466)             | 0.001   |
| 6MWT nadir SpO <sub>2</sub> (%)†                 | 88 (82, 93)                  | 87 (81, 92)                | 90 (83, 93)                | 0.02    |
| MMRC Dyspnoea Scale†                             | 2 (1, 2)                     | 2 (1, 2)                   | 2 (1, 3)                   | 0.73    |

|                             |                      |                      |                      |              |
|-----------------------------|----------------------|----------------------|----------------------|--------------|
| SGRQ                        |                      |                      |                      |              |
| Symptom score <sup>†</sup>  | 56.9 (37.7,<br>75.9) | 57.1 (38.9,<br>75.9) | 53.0 (34.3,<br>78.7) | 0.85<br>0.74 |
| Activity score <sup>†</sup> | 66.2 (47.7,<br>82.2) | 66.2 (47.6,<br>81.9) | 66.2 (48.1,<br>85.8) | 0.39<br>0.67 |
| Impact score <sup>†</sup>   | 35.1 (20.4,<br>52.0) | 35.3 (20.0,<br>50.6) | 33.9 (21.8,<br>62.4) |              |
| Total score <sup>†</sup>    | 49.1 (33.1,<br>64.4) | 49.1 (33.4,<br>64.0) | 49.4 (30.7,<br>69.5) |              |
| UCSD-SOBQ <sup>‡</sup>      | 39 (19, 60)          | 38 (20, 60)          | 39 (16, 62)          | 0.89         |

Data expressed as: \* mean  $\pm$  standard deviation; † median (interquartile range)

<sup>‡</sup> Cardiorespiratory comorbidities included asthma, chronic obstructive pulmonary disease, pulmonary embolism, pulmonary hypertension and any cardiac diseases

<sup>§</sup> Not including patients who were prescribed long-term oxygen therapy

Abbreviations: 6MWT, 6-minute walk test; BMI, body mass index; DLCO, diffusion capacity of the lung for carbon monoxide; FEV<sub>1</sub>, forced expiratory volume in one second; FVC, forced vital capacity; MMRC, Modified Medical Research Council; SGRQ, St George's Respiratory Questionnaire; SpO<sub>2</sub>, oxyhaemoglobin saturation; USCD-SOBQ, University of California San Diego Shortness of Breath Questionnaire.

Table S3. Frequencies of types of ILD

| <b>Diagnosis</b>                             | <b>Analysed<br/>Cohort<br/>(n = 400)</b> | <b>Alfred Health<br/>(n = 299)</b> | <b>Austin<br/>Health<br/>(n = 101)</b> |
|----------------------------------------------|------------------------------------------|------------------------------------|----------------------------------------|
| Asbestosis                                   | 8 (2)                                    | 5 (2)                              | 3 (3)                                  |
| Chronic hypersensitivity pneumonitis         | 57 (14)                                  | 44 (15)                            | 13 (13)                                |
| Combined pulmonary fibrosis and<br>emphysema | 36 (9)                                   | 28 (9)                             | 8 (8)                                  |
| Connective tissue disease-related ILD        | 44 (11)                                  | 28 (9)                             | 16 (16)                                |
| Idiopathic pulmonary fibrosis                | 134 (33.5)                               | 105 (35)                           | 29 (29)                                |
| Non-specific interstitial pneumonia          | 22 (5.5)                                 | 16 (5)                             | 6 (6)                                  |
| Sarcoidosis                                  | 28 (7)                                   | 22 (7)                             | 6 (6)                                  |
| Unclassifiable ILD                           | 40 (10)                                  | 26 (9)                             | 14 (14)                                |
| Other                                        | 31 (8)                                   | 25 (8)                             | 6 (6)                                  |

Data expressed as absolute number (percentage)
